# Supplementary material
Source: PubMed Central journal article supplement (PMC8489876)
Supplement: mmc1.pdf [file mmc1.pdf]

# THE LANCET

## Infectious Diseases

### Supplementary appendix

This appendix formed part of the original submission. We post it as supplied by the authors.

This online publication has been corrected. The corrected version first appeared at [thelancet.com/infection](https://www.thelancet.com/infection) on Nov 24, 2021.

Supplement to: The ISARIC Clinical Characterisation Group. The value of open-source clinical science in pandemic response: lessons from ISARIC. *Lancet Infect Dis* 2021; published online Oct 4. [https://doi.org/10.1016/S1473-3099\(21\)00565-X](https://doi.org/10.1016/S1473-3099(21)00565-X).

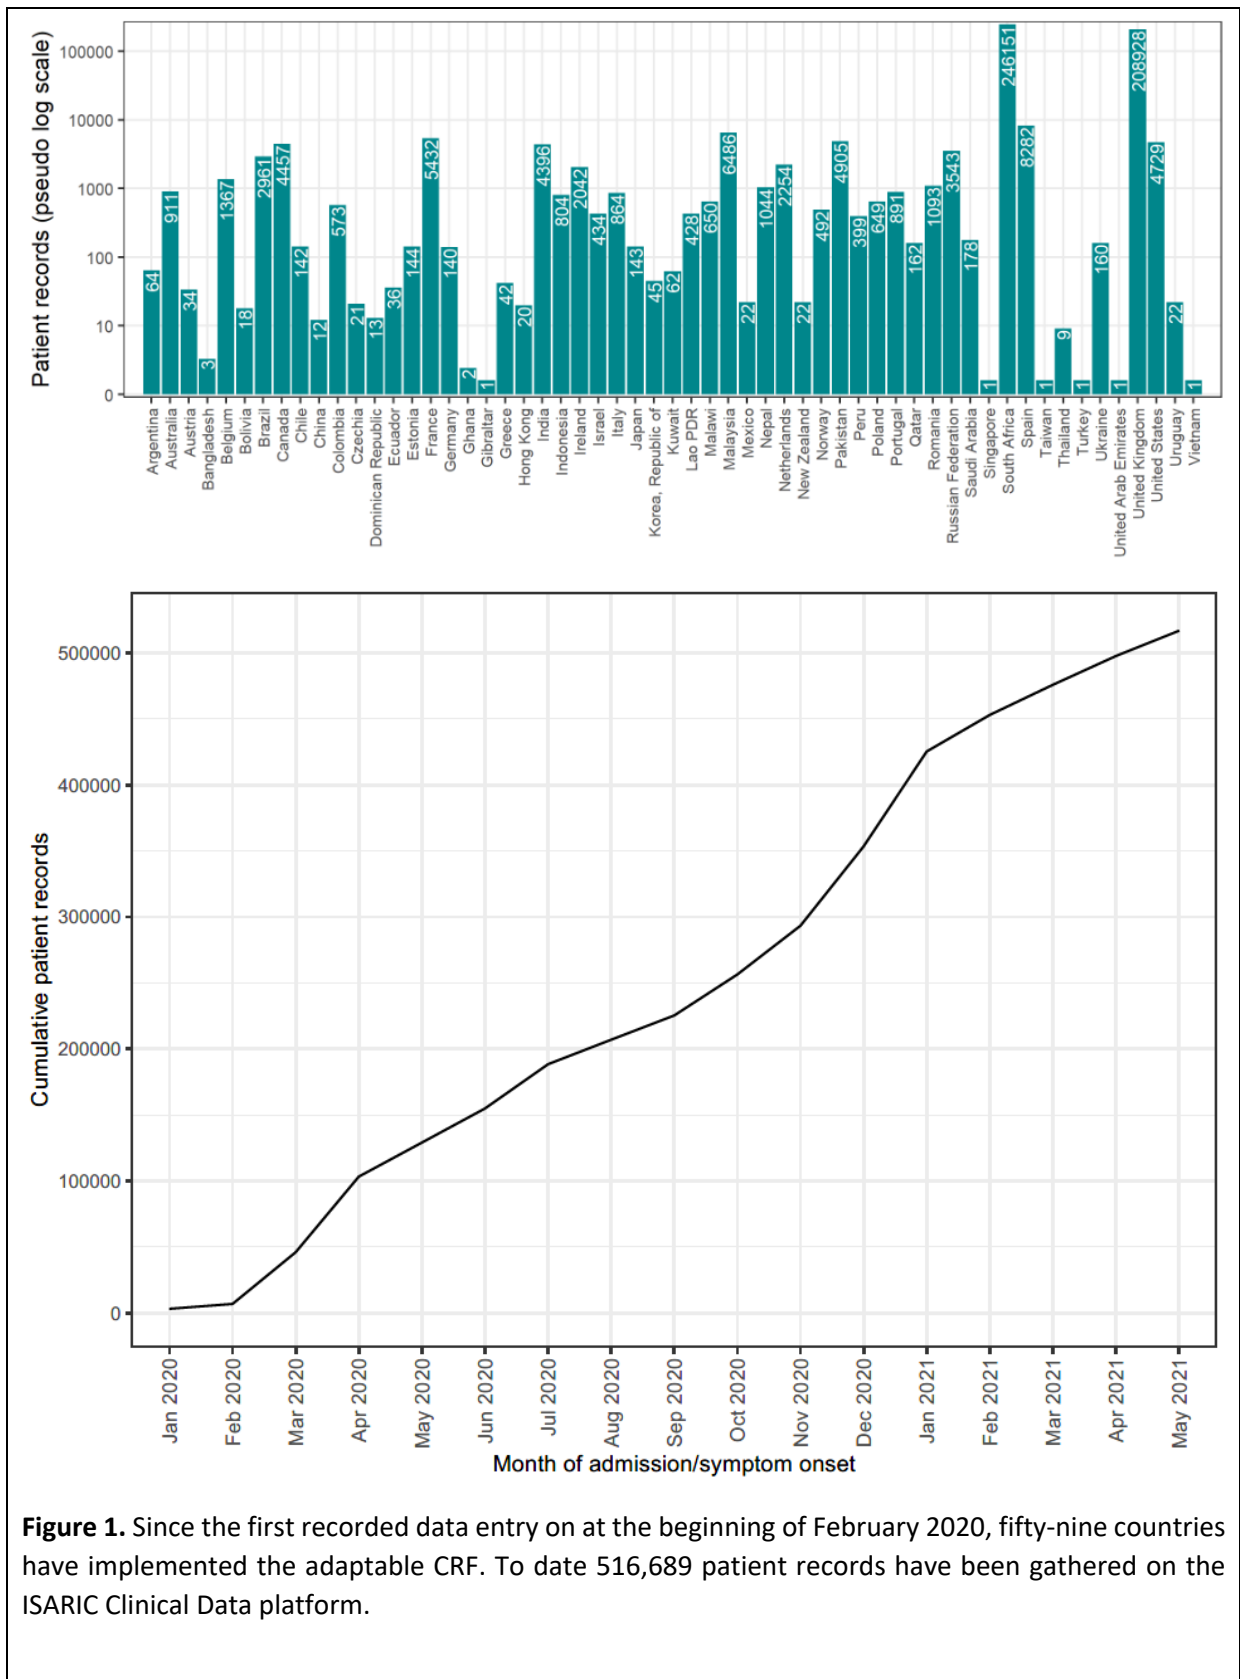

**Figure 1.** Since the first recorded data entry on at the beginning of February 2020, fifty-nine countries have implemented the adaptable CRF. To date 516,689 patient records have been gathered on the ISARIC Clinical Data platform.

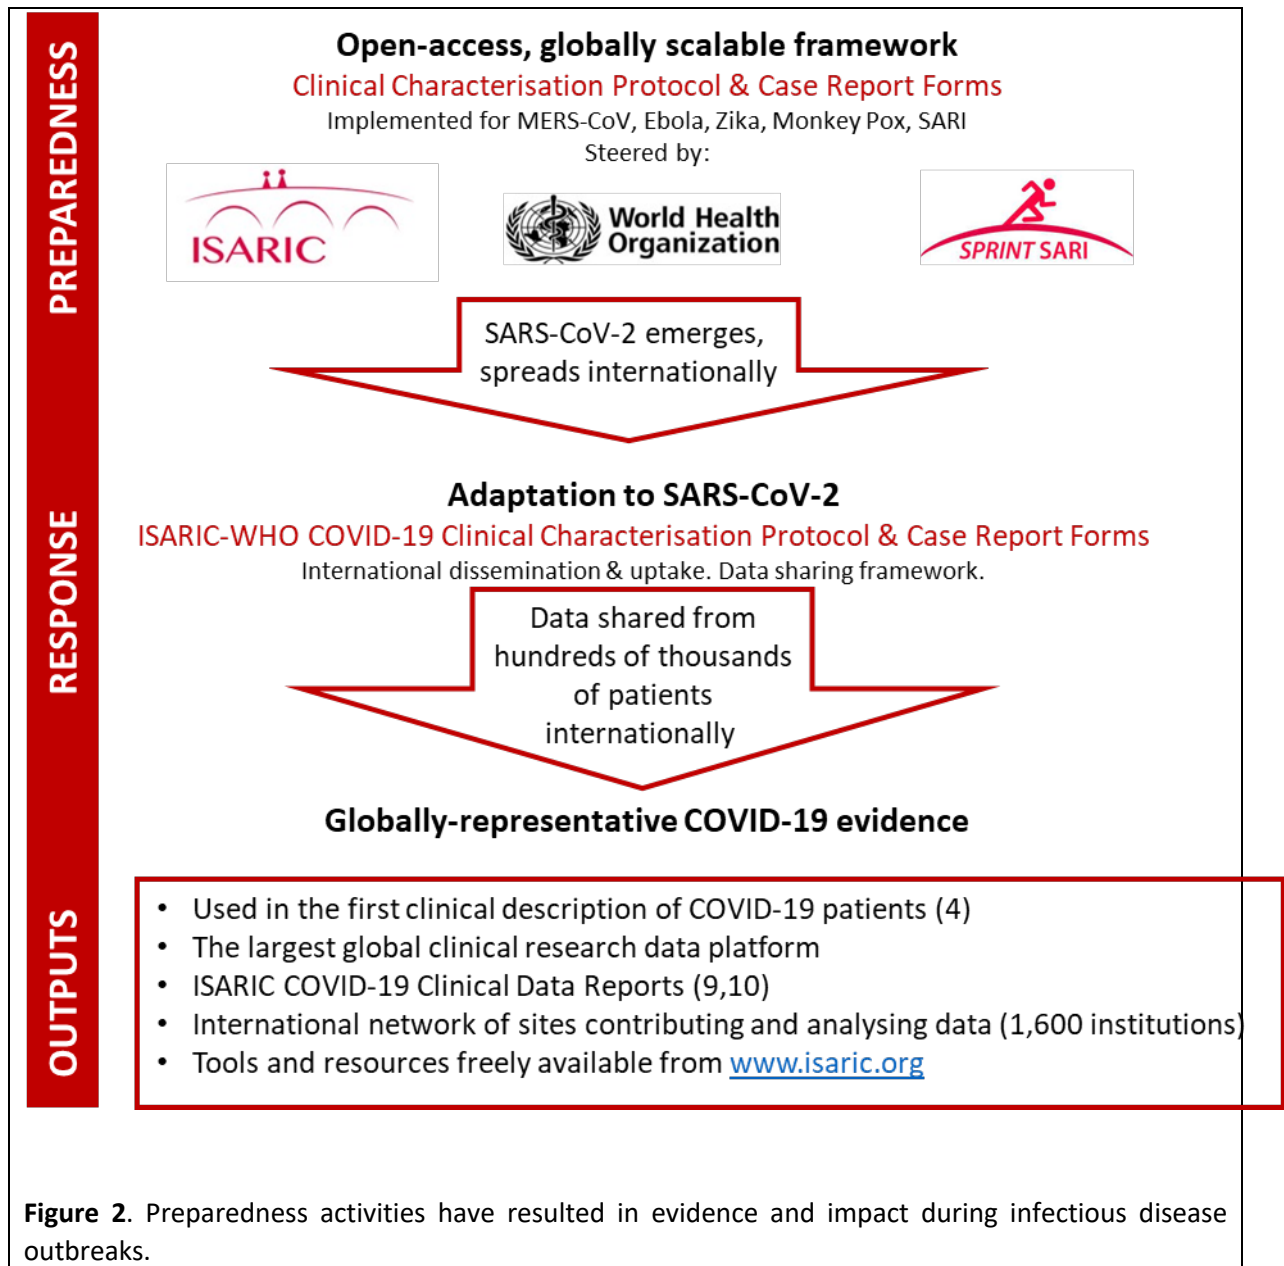

**Feedback from International Collaborators** “This is tremendous work and unique to the field that despite all our challenges we are able to come together to learn from each other. Again, we appreciate the inclusion, transparency and we hope we can collaborate with the analysis that are under way.” USA

“It is an utmost pleasure collaborating with you and I hope that we will be able to meet as soon as pandemic is over.” Russia

“For us it is fundamental to collaborate with ISARIC Consortium and contribute quality data.” Spain

“On behalf of our institution, we would like to thank your great effort in coordinating this.” Malaysia

“The entire team deeply appreciates ISARIC for its constant support, even in times as difficult as these.” India

**Figure 3.** Selected quotes from global collaborators

## AUTHORS

### ISARIC Clinical Characterisation Group\*

Ali Abbas; Sheryl Ann Abdukahil; Nurul Najmee Abdulkadir; Ryuzo Abe; Laurent Abel; Lara Absil; Subhash Acharya; Andrew Acker; Shingo Adachi; Elisabeth Adam; Diana Adrião; Saleh Al Ageel; Shakeel Ahmed; Quratul Ain; Kate Ainscough; Tharwat Aisa; Ali Ait Hssain; Younes Ait Tamlihat; Takako Akimoto; Ernita Akmal; Eman Al Qasim; Razi Alalqam; Tanvir Alam; Tala Al-dabbous; Senthilkumar Alegesan; Cynthia Alegre; Marta Alessi; Beatrice Alex; Kévin Alexandre; Abdulrahman Al-Fares; Huda Alfoudri; Imran Ali; Naseem Ali Shah; Kazali Enagnon Alidjnou; Jeffrey Aliudin; Qabas Alkhafajee; Clotilde Allavena; Nathalie Allou; Aneela Altaf; João Melo Alves; João Alves; Rita Alves; Maria Amaral; Nur Amira; Heidi Ammerlaan; Phoebe Ampaw; Roberto Andini; Claire Andrejak; Andrea Angheben; François Angoulvant; Séverine Ansart; Sivanesen Anthonidass; Massimo Antonelli; Carlos Alexandre Antunes de Brito; Kazi Rubayet Anwar; Ardiyan Apriyana; Yaseen Arabi; Irene Aragao; Rajeshwari Arali; Francisco Arancibia; Carolline Araujo; Antonio Arcadipane; Patrick Archambault; Lukas Arenz; Jean-Benoît Arlet; Christel Arnold-Day; Ana Aroca; Lovkesh Arora; Rakesh Arora; Elise Artaud-Macari; Diptesh Aryal; Motohiro Asaki; Angel Asensio; Elizabeth Ashley; Muhammad Ashraf; Sheharyar Ashraf; Mohammad Asim; Jean Baptiste Assie; Amirul Asyraf; Anika Atique; AM Udara Lakshan Attanyake; Johann Auchabie; Hugues Aumaitre; Adrien Auvet; Laurène Azemar; Cecile Azoulay; Benjamin Bach; Delphine Bachelet; Claudine Badr; Nadia Baig; J. Kenneth Baillie; J Kevin Baird; Erica Bak; Agamemnon Bakakos; Nazreen Abu Bakar; Andriy Bal; Mohanaprasanth Balakrishnan; Valeria Balan; Firouzé Bani-Sadr; Renata Barbalho; Nicholas Yuri Barbosa; Wendy S. Barclay; Saef Umar Barnett; Michaela Barnikel; Helena Barrasa; Audrey Barrelet; Cleide Barrigoto; Marie Bartoli; Cheryl Bartone; Joaquín Baruch; Mustehan Bashir; Romain Basmaci; Muhammad Fadhli Hassin Basri; Diego Bastos; Denise Battaglini; Jules Bauer; Diego Fernando Bautista Rincon; Denisse Bazan Dow; Alexandra Bedossa; Ker Hong Bee; Sylvie Behilill; Albertus Beishuizen; Aleksandr Beljantsev; David Bellemare; Anna Beltrame; Beatriz Amorim Beltrão; Marine Beluze; Nicolas Benech; Lionel Eric Benjiman; Dehbia Benkerrou; Suzanne Bennett; Luís Bento; Jan-Erik Berdal; Delphine Bergeaud; Hazel Bergin; José Luis Bernal Sobrino; Giulia Bertoli; Lorenzo Bertolino; Simon Bessis; Adam Betz; Sybille Bevilacqua; Karine Bezulier; Amar Bhatt; Krishna Bhavsar; Isabella Bianchi; Claudia Bianco; Farah Nadiyah Bidin; Moirangthem Bikram Singh; Felwa Bin Humaid; Mohd Nazlin Bin Kamarudin; François Bissuel; Patrick Biston; Laurent Bitker; Pablo Blanco-Schweizer; Catherine Blier; Frank Bloos; Mathieu Blot; Lucille Blumberg; Filomena Boccia; Laetitia Bodenes; Alice Bogaarts; Debby Bogaert; Anne-Hélène Boivin; Pierre-Adrien Bolze; François Bompert; Aurelius Bonfasius; Diogo Borges; Raphaël Borie; Hans Martin Bosse; Elisabeth Botelho-Nevers; Lila Bouadma; Olivier Bouchaud; Sabelline Bouchez; Dounia Bouhmani; Damien Bouhour; Kévin Bouiller; Laurence Bouillet; Camile Bouisse; Anne-Sophie Boureau; John Bourke; Maude Bouscambert; Aurore Bousquet; Jason Bouziotis; Bianca Boxma; Marielle Boyer-Besseyre; Maria Boylan; Fernando Augusto Bozza; Matthew Brack; Axelle Braconnier; Cynthia Braga; Timo Brandenburger; Filipa Brás Monteiro; Luca Brazzi; Dorothy Breen; Patrick Breen; Patrick Breen; Stephen Brett; Kathy Brickell; Tessa Broadley; Alex Browne; Shaunagh Browne; Nicolas Brozzi; Marjolein Brusse-Keizer; Nina Buchtele; Christian Buesaquillo; Polina Bugaeva; Marielle Buisson; Erlina Burhan; Aidan Burrell; Ingrid G. Bustos; Denis Butnaru; André Cabie; Susana Cabral; Eder Caceres; Cyril Cadoz; Mia Callahan; Kate Calligy; Jose Andres Calvache; João Cam; Valentine Campana; Paul Campbell; Josie Campisi; Cecilia Canepa; Mireia Cantero; Pauline Caraux-Paz; Sheila Cárcel; Chiara Simona Cardellino; Filipa Cardoso; Filipe Cardoso; Nelson Cardoso; Sofia Cardoso; Simone Carelli; Nicolas Carlier; Thierry Carmoi; Gayle Carney; Chloe Carpenter; Inês Carqueja; Marie-Christine Carret; François Martin Carrier; Ida Carroll; Gail Carson; Ed Carton; Maire-Laure Casanova; Mariana Cascão; Siobhan Casey; José Casimiro; Bailey Cassandra; Silvia Castañeda; Nidyanara Castanheira; Guylaine Castor-Alexandre; Henry Castrillón; Ivo Castro; Ana Catarino; François-Xavier Catherine; Paolo Cattaneo; Roberta Cavalin; Giulio Giovanni Cavalli; Alexandros Cavayas; Adrian Ceccato; Minerva Cervantes-Gonzalez; Anissa Chair; Catherine Chakveatze; Adrienne Chan; Meera Chand; Christelle

Chantalat Auger; Jean-Marc Chapplain; Julie Chas; Mobin Chaudary; Jonathan Samuel Chávez Iñiguez; Anjellica Chen; Yih-Sharng Chen; Matthew Pellan Cheng; Antoine Cheret; Thibault Chiarabini; Julian Chica; Suresh Kumar Chidambaram; Leong Chin-Tho; Catherine Chirouze; Davide Chiumello; Hwa Jin Cho; Sung-Min Cho; Bernard Cholley; Marie-Charlotte Chopin; Yock Ping Chow; Ting Soo Chow; Hiu Jian Chua; Jonathan Chua; Jose Pedro Cidade; José Miguel Cisneros Herreros; Barbara Wanjiru Citarella; Anna Ciullo; Emma Clarke; Jennifer Clarke; Rolando Claude Del Granado; Sara Clohisey; J. Perren Cobb; Necsoi Coca; Cassidy Codan; Caitriona Cody; Alexandra Coelho; Megan Coles; Gwenhaël Colin; Michael Collins; Sebastiano Maria Colombo; Pamela Combs; Jennifer Connolly; Marie Connor; Anne Conrad; Sofía Contreras; Elaine Conway; Graham S. Cooke; Mary Copland; Hugues Cordel; Amanda Corley; Sarah Cormican; Sabine Cornelis; Alexander Daniel Cornet; Arianne Joy Corpuz; Andrea Cortegiani; Grégory Corvaisier; Emma Costigan; Camille Couffignal; Sandrine Couffin-Cadiergues; Roxane Courtois; Stéphanie Cousse; Rachel Cregan; Charles Crepy D'Orleans; Sabine Croonen; Gloria Crowl; Jonathan Crump; Claudina Cruz; Juan Luis Cruz Berm; Jaime Cruz Rojo; Marc Csete; Alberto Cucino; Ailbhe Cullen; Caroline Cullen; Matthew Cummings; Gerard Curley; Elodie Curlier; Colleen Curran; Paula Custodio; Ana da Silva Filipe; Charlene Da Silveira; Al-Awwab Dabaliz; Andrew Dagens; Darren Dahly; Heidi Dalton; Jo Dalton; Seamus Daly; Federico D'Amico; Nick Daneman; Corinne Daniel; Emmanuelle A Dankwa; Jorge Dantas; Frédérick D'Aragon; Mark de Boer; Gillian de Loughry; Diego de Mendoza; Etienne De Montmollin; Rafael Freitas de Oliveira França; Ana Isabel de Pinho Oliveira; Rosanna De Rosa; Thushan de Silva; Peter de Vries; Jillian Deacon; David Dean; Alexa Debard; Bianca DeBenedictis; Marie-Pierre Debray; Nathalie DeCastro; William Dechert; Lauren Deconninck; Romain Decours; Eve Defous; Isabelle Delacroix; Eric Delaveuve; Karen Delavigne; Nathalie M. Delfos; Ionna Deligiannis; Andrea Dell'Amore; Christelle Delmas; Pierre Delobel; Corine Delsing; Elisa Demonchy; Emmanuelle Denis; Dominique Deplanque; Pieter Depuydt; Mehul Desai; Diane Descamps; Mathilde Desvallée; Santi Dewayanti; Alpha Diallo; Sylvain Diamantis; André Dias; Rodrigo Diaz; Priscila Diaz; Juan Jose Diaz Diaz; Kévin Didier; Jean-Luc Diehl; Wim Dieperink; Jérôme Dimet; Vincent Dinot; Fara Diop; Alphonsine Diouf; Yael Dishon; Devika Dixit; Félix Djossou; Annemarie B. Docherty; Helen Doherty; Arjen M Dondorp; Andy Dong; Christl A. Donnelly; Maria Donnelly; Chloe Donohue; Yoann Donohue; Sean Donohue; Ciara Doran; Peter Doran; Céline Dorival; Eric D'Ortenzio; James Joshua Douglas; Renee Douma; Nathalie Dournon; Triona Downer; Joanne Downey; Mark Downing; Tom Drake; Aoife Driscoll; Murray Dryden; Claudio Duarte Fonseca; Vincent Dubee; François Dubos; Alexandre Ducancelle; Toni Duculan; Susanne Dudman; Abhijit Duggal; Paul Dunand; Jake Dunning; Mathilde Duplaix; Emanuele Durante-Mangoni; Lucian Durham III; Bertrand Dussol; Juliette Duthoit; Xavier Duval; Anne Margarita Dyrhol-Riise; Sim Choon Ean; Marco Echeverria-Villalobos; Siobhan Egan; Carla Eira; Mohammed El Sanharawi; Subbarao Elapavaluru; Brigitte Elharrar; Jacobien Ellerbroek; Philippine Eloy; Tarek Elshazly; Iqbal Elyazar; Isabelle Enderle; Tomoyuki Endo; Chan Chee Eng; Ilka Engelmann; Vincent Enouf; Olivier Epaulard; Martina Escher; Mariano Esperatti; Héléne Esperou; Marina Esposito-Farese; João Estevão; Manuel Etienne; Nadia Ettalhaoui; Anna Greti Everding; Mirjam Evers; Isabelle Fabre; Marc Fabre; Amna Faheem; Arabella Fahy; Cameron J. Fairfield; Zul Fakar; Pedro Faria; Ahmed Farooq; Jeremy J. Farrar; Nataly Farshait; Hanan Fateena; Arie Zainul Fatoni; Karine Faure; Raphaël Favory; Mohamed Fayed; Niamh Feely; Laura Feeney; Jorge Fernandes; Marília Fernandes; Susana Fernandes; François-Xavier Ferrand; Eglantine Ferrand Devouge; Joana Ferrão; Mário Ferraz; Benigno Ferreira; Sílvia Ferreira; Ricard Ferrer-Roca; Nicolas Ferriere; Céline Ficko; Claudia Figueiredo-Mello; Juan Fiorda; Thomas Flament; Clara Flateau; Tom Fletcher; Letizia Lucia Florio; Brigid Flynn; Deirdre Flynn; Claire Foley; Jean Foley; Victor Fomin; Tatiana Fonseca; Patricia Fontela; Simon Forsyth; Denise Foster; Giuseppe Foti; Erwan Fourn; Robert A. Fowler; Dr Marianne Fraher; Diego Franch-Llasat; Christophe Fraser; John F. Fraser; Marcela Vieira Freire; Ana Freitas Ribeiro; Caren Friedrich; Ricardo Fritz; Stéphanie Fry; Nora Fuentes; Masahiro Fukuda; Valérie Gaborieau; Rostane Gaci; Massimo Gagliardi; Jean-Charles Gagnard; Nathalie Gagné ; Amandine Gagneux-Brunon; Sérgio Gaião; Linda Gail Skeie; Phil Gallagher; Elena Gallego Curto; Carrol Gamble; Yasmin Gani; Arthur Garan; Rebekha Garcia; Noelia García Barrio; Julia Garcia-Diaz; Esteban Garcia-Gallo; Navya Garimella; Denis Garot; Valérie Garrait; Basanta Gauli; Nathalie Gault; Aisling

Gavin; Anatoliy Gavrylov; Alexandre Gaymard; Johannes Gebauer; Eva Geraud; Louis Gerbaud Morlaes; Nuno Germano; praveen kumar ghisulal; Jade Ghosn; Marco Giani; Carlo Giaquinto; Jess Gibson; Tristan Gigante; Morgane Gilg; Elaine Gilroy; Guillermo Giordano; Michelle Girvan; Valérie Gissot; Judy Gitahi; Gezy Giwangkencana; Daniel Glikman; Petr Glybochko; Eric Gnall; Geraldine Goco; François Goehringer; Siri Goepel; Jean-Christophe Goffard; Jin Yi Goh; Jonathan Golob; Rui Gomes; Kyle Gomez; Joan Gómez-Junyent; Marie Gominet; Alicia Gonzalez; Anthony Gordon; Patricia Gordon; Isabelle Gorenne; Laure Goubert; Cécile Goujard; Tiphaine Goulenok; Margarite Grable; Jeronimo Graf; Edward Wilson Grandin; Pascal Granier; Giacomo Grasselli; Lorenzo Grazioli; Christopher A. Green; Courtney Greene; William Greenhalf; Segolène Greffe; Domenico Luca Grieco; Matthew Griffee; Fiona Griffiths; Ioana Grigoras; Albert Groenendijk; Anja Grosse Lordemann; Heidi Gruner; Yusing Gu; Fabio Guarracino; Jérémie Guedj; Martin Guego; Dewi Guellec; Anne-Marie Guerguerian; Daniela Guerreiro; Romain Guery; Anne Guillaumot; Laurent Guilleminault; Maisa Guimarães de Castro; Thomas Guimard; Marieke Haalboom; Daniel Haber; Hannah Habraken; Ali Hachemi; Nadir Hadri; Olena Haidash; Saeeda Haider; Fakhir Haidri; Sheeba Hakak; Adam Hall; Matthew Hall; Sophie Halpin; Ansley Hamer; Raph Hamers; Rebecca Hamidfar; Terese Hammond; Lim Yuen Han; Rashan Haniffa; Kok Wei Hao; Hayley Hardwick; Ewen M. Harrison; Janet Harrison; Samuel Bernard Ekow Harrison; Alan Hartman; Junaid Hashmi; Madiha Hashmi; Muhammad Hayat; Ailbhe Hayes; Leanne Hays; Jan Heerman; Lars Heggelund; Ross Hendry; Martina Hennessy; Aquiles Henriquez; Maxime Hentzien; Fivzia Herekar; Jaime Hernandez-Montfort; Daniel Herr; Andrew Hershey; Liv Hesstvedt; Astarini Hidayah; Eibhilin Higgins; Dawn Higgins; Grainne HigginsOKeeffe; Rita Hinchion; Samuel Hinton; Hiroaki Hiraiwa; Hikombo Hitoto; Antonia Ho; Yi Bin Ho; Alexandre Hoctin; Isabelle Hoffmann; Wei Han Hoh; Oscar Hoiting; Rebecca Holt; Jan Cato Holter; Peter Horby; Juan Pablo Horcajada; Koji Hoshino; Kota Hoshino; Ikram Houas; Catherine L. Hough; Stuart Houltham; Jimmy Ming-Yang Hsu; Jean-Sébastien Hulot; Iqbal Hussain; Samreen Ijaz; Hajnal-Gabriela Illes; Patrick Imbert; Mohammad Imran; Rana Imran Sikander; Hugo Inácio; Carmen Infante Dominguez; Yun Sii Ing; Elias Iosifidis; Mariachiara Ippolito; Sarah Isgett; Palliya Guruge Pramodya Ishani Ishani; Tiago Isidoro; Nadiah Ismail; Margaux Isnard; Junji Itai; Asami Ito; Daniel Ivulich; Danielle Jaafar; Salma Jaafoura; Julien Jabot; Clare Jackson; Nina Jamieson; Pierre Jaquet; Waasila Jassat; Coline Jaud-Fischer; Stéphane Jaureguiberry; Jeffrey Javidfar; Issrah Jawad; Denise Jaworsky; Devachandran Jayakumar; Florence Jego; Anilawati Mat Jelani; Synne Jenum; Ruth Jimbo-Sotomayor; van der Palen Job; Ong Yiaow Joe; Ruth N. Jorge García; Cédric Joseph; Mark Joseph; Swosti Joshi; Mercé Jourdain; Philippe Jouvét; Jennifer June; Anna Jung; Hanna Jung; Dafsah Juzar; Ouifiya Kafif; Florentia Kaguelidou; Neerusha Kaisbain; Thavamany Kaleesvran; Sabina Kali; Alina Kalicinska; Smaragdi Kalomoiri; Saima Kamal; Muhammad Aisar Ayadi Kamaluddin; Zul Amali Che Kamaruddin; Nadiah Kamarudin; Darshana Hewa Kandamby; Chris Kandel; Kong Yeow Kang; Ravi Kant; Darakhshan Kanwal; Dyah Kanyawati; Bipin Karki; Pratap Karpayah; Todd Karsies; Christiana Kartsonaki; Daisuke Kasugai; Anant Kataria; Kevin Katz; Aasmine Kaur; Simreen Kaur Johal; Tatsuya Kawasaki; Christy Kay; Hannah Keane; Seán Keating; Paul Kellam; Andrea Kelly; Aoife Kelly; Claire Kelly; Niamh Kelly; Sadie Kelly; Yvelynne Kelly; Maeve Kelsey; Ryan Kennedy; Kalynn Kennon; Maeve Kernan; Younes Kerroumi; Sharma Keshav; Evelyne Kestelyn; Osama Khalid; Imrana Khalid; Antoine Khalil; Coralie Khan; Irfan Khan; Sushil Khanal; Michelle E Kho; Denisa Khoo; Ryan Khoo; Saye Khoo; Nasir Khoso; Khor How Kiat; Yuri Kida; Peter Kiiza; Anders Benjamin Kildal; Jae Burm Kim; Antoine Kimmoun; Detlef Kindgen-Milles; Alexander King; Nobuya Kitamura; Paul Klenerman; Rob Klont; Gry Kloumann Bekken; Stephen Knight; Robin Kobbe; Chamira Kodippily; Malte Kohns Vasconcelos; Sabin Koirala; Mamoru Komatsu; Volkan Korten; Caroline Kosgei; Arsène Kpangon; Karolina Krawczyk; Vinothini Krishnan; Sudhir Krishnan; Oksana Kruglova; Ashok Kumar; Deepali Kumar; Ganesh Kumar; Mukesh Kumar; Pavan Kumar Vecham; Dinesh Kuriakose; Ethan Kurtzman; Neurinda Permata Kusumastuti; Demetrios Kutsogiannis; Galyna Kutsyna; Konstantinos Kyriakoulis; Marie Lachatre; Marie Lacoste; John G. Laffey; Marie Lagrange; Fabrice Laine; Olivier Lairez; Sanjay Lakhey; Antonio Lalueza; Marc Lambert; François Lamontagne; Marie Langelot-Richard; Vincent Langlois; Eka Yudha Lantang; Marina Lanza; Cédric Laouéan; Samira Laribi; Delphine Lariviere; Stéphane Lasry; Naveed Latif; Odile Launay; Didier Laureillard; Yoan Lavie-Badie; Andy Law; Cassie

Lawrence; Teresa Lawrence; Minh Le; Clément Le Bihan; Cyril Le Bris; Georges Le Falher; Lucie Le Freve; Quentin Le Hingrat; Marion Le Maréchal; Soizic Le Mestre; Gwenaël Le Moal; Vincent Le Moing; Hervé Le Nagard; Paul Le Turnier; Ema Leal; Marta Leal Santos; Biing Horng Lee; Heng Gee Lee; Su Hwan Lee; James Lee; Todd C. Lee; Yi Lin Lee; Gary Leeming; Bénédicte Lefebvre; Laurent Lefebvre; Benjamin Lefevre; Sylvie LeGac; Jean-Daniel Lelievre; François Lellouche; Adrien Lemaigen; Véronique Lemeé; Anthony Lemeur; Gretchen Lemmink; Ha Sha Lene; Jenny Lennon; Rafael León; Marc Leone; Michela Leone; Quentin Lepiller; François-Xavier Lescure; Olivier Lesens; Mathieu Lesouhaitier; Amy Lester-Grant; Bruno Levy; Yves Levy; Claire Levy-Marchal; Katarzyna Lewandowska; Erwan L'Her; Gianluigi Li Bassi; Janet Liang; Ali Liaquat; Geoffrey Liegeon; Kah Chuan Lim; Wei Shen Lim; Chantre Lima; Bruno Lina; Lim Lina; Andreas Lind; Guillaume Lingas; Sylvie Lion-Daolio; Samantha Lissauer; Keibun Liu; Marine Livrozet; Patricia Lizotte; Antonio Loforte; Navy Lolong; Leong Chee Loon; Diogo Lopes; Dalia Lopez-Colon; Anthony L. Loschner; Paul Loubet; Bouchra Loufti; Guillame Louis; Silvia Lourenco; Lara Lovelace-Macon; Lee Lee Low; Marije Lowik; Jia Shyi Loy; Jean Christophe Lucet; Carlos Lumbreras Bermejo; Carlos M. Luna; Olguta Lungu; Liem Luong; Nestor Luque; Dominique Luton; Nilar Lwin; Ruth Lyons; Olavi Maasikas; Oryane Mabilia; Sarah MacDonald; Samuel MacDonald; Moïse Machado; Gabriel Macheda; Juan Macias Sanchez; Jai Madhok; Guillermo Maestro de la Calle; Rafael Mahieu; Sophie Mahy; Ana Raquel Maia; Lars S. Maier; Mylène Maillet; Thomas Maitre; Maximilian Malfertheiner; Nadia Malik; Paddy Mallon; Fernando Maltez; Denis Malvy; Victoria Manda; Jose M. Mandei; Laurent Mandelbrot; Frank Manetta; Kishore Mangal; Julie Mankikian; Edmund Manning; Aldric Manuel; Ceila Maria Sant'Ana Malaque; Daniel Marino; Flávio Marino; Samuel Markowicz; Charbel Maroun Eid; Ana Marques; Catherine Marquis; Brian Marsh; Laura Marsh; Megan Marshal; John Marshall; Celina Turchi Martelli; Dori-Ann Martin; Emily Martin; Guillaume Martin-Blondel; Alessandra Martinelli; Ignacio Martin-Loeches; Martin Martinot; Alejandro Martin-Quiros; Ana Martins; João Martins; Nuno Martins; Caroline Martins Rego; Gennaro Martucci; Olga Martynenko; Eva Miranda Marwali; Marsilla Marzukie; Juan Fernando Masa Jimenez; David Maslove; David Maslove; Phillip Mason; Sabina Mason; Sobia Masood; Sobia Masood; Basri Mat Nor; Moshe Matan; Henrique Mateus Fernandes; Meghena Mathew; Daniel Mathieu; Mathieu Mattei; Romans Matulevics; Laurence Maulin; Michael Maxwell; Javier Maynar; Thierry Mazzoni; Lisa Mc Sweeney; Lorraine McAndrew; Colin McArthur; Aine McCarthy; Anne McCarthy; Colin McCloskey; Rachael McConnochie; Sherry McDermott; Sarah E. McDonald; Aine McElroy; Samuel McElwee; Victoria McEneany; Natalie McEvoy; Allison McGeer; Chris McKay; Johnny McKeown; Kenneth A. McLean; Paul McNally; Bairbre McNicholas; Elaine McPartlan; Edel Meaney; Cécile Mear-Passard; Maggie Mechlin; Maqsood Meher; Omar Mehkri; Ferruccio Mele; Luis Melo; Kashif Memon; Joao Joao Mendes; Ogechukwu Menkiti; Kusum Menon; France Mentré; Alexander J. Mentzer; Emmanuelle Mercier; Noémie Mercier; Antoine Merckx; Mayka Mergeay-Fabre; Blake Mergler; Laura Merson; António Mesquita; Osama Metwally; Agnès Meybeck; Dan Meyer; Alison M. Meynert; Vanina Meysonnier; Amina Meziane; Mehdi Mezidi; Giuliano Michelagnoli; Céline Michelangelei; Isabelle Michelet; Efstathia Mihelis; Vladislav Mihnovit; Hugo Miranda-Maldonado; Nor Arisah Misnan; Nik Nur Eliza Mohamed; Tahira Jamal Mohamed; Asma Moin; David Molina; Elena Molinos; Brenda Molloy; Mary Mone; Agostinho Monteiro; Claudia Montes; Giorgia Montrucchio; Sarah Moore; Shona C. Moore; Lina Morales Cely; Lucia Moro; Diego Rolando Morocho Tutillo; Ben Morton; Catherine Motherway; Ana Motos; Hugo Mouquet; Clara Mouton Perrot; Julien Moyet; Caroline Mudara; Aisha Kalsoom Mufti; Ng Yong Muh; Dzawani Muhamad; Jimmy Mullaert; Fredrik Muller; Karl Erik Müller; Daniel Munblit; Syed Muneeb; Nadeem Munir; Laveena Munshi; Aisling Murphy; Aisling Murphy; Lorna Murphy; Marlène Murriss; Srinivas Murthy; Himed Musaab; Gugapriyaa Muyandy; Dimitra Melia Myrodia; Namra N; Dave Nagpal; Alex Nagrebetsky; Mangala Narasimhan; Nageswaran Narayanan; Rashid Nasim Khan; Alasdair Nazerali-Maitland; Nadège Neant; Holger Neb; Nikita A Nekliudov; Erni Nelwan; Raul Neto; Emily Neumann; Bernardo Neves; Pauline Yeung Ng; Anthony Nghi; Duc Nguyen; Orna Ni Choileain; Niamh Ni Leathlobhair; Alistair Nichol; Prompak Nitayavardhana; Stephanie Nonas; Nurul Amani Mohd Noordin; Marion Noret; Nurul Faten Izzati Norharizam; Lisa Norman; Alessandra Notari; Mahdad Noursadeghi; Karolina Nowicka; Adam Nowinski; Saad Nseir; Jose I Nunez;



Nurnaningsih Nurnaningsih; Elsa Nyamankolly; Fionnuala O'Brien; Annmarie O'Callaghan; Annmarie O'Callaghan; Giovanna Occhipinti; Derbrenn O'Connor; Max O'Donnell; Tawnya Ogston; Takayuki Ogura; Tak-Hyuk Oh; Sophie O'Halloran; Katie O'Hearn; Shinichiro Ohshimo; Agnieszka Oldakowska; João Oliveira; Larissa Oliveira; Piero L. Olliaro; Conar O'Neil; David S.Y. Ong; Jee Yan Ong; Wilna Oosthuyzen; Anne Opavsky; Peter Openshaw; Saijad Orakzai; Claudia Milena Orozco-Chamorro; Andrés Orquera; Jamel Ortoleva; Javier Osatnik; Linda O'Shea; Miriam O'Sullivan; Siti Zubaidah Othman; Nadia Ouamara; Rachida Ouissa; Clark Owyang; Eric Oziol; H M Upulee Pabasara; Maïder Pagadoy; Justine Pages; Amanda Palacios; Mario Palacios; Massimo Palmarini; Giovanna Panarello; Prasan Kumar Panda; Hem Paneru; Lai Hui Pang; Mauro Panigada; Nathalie Pansu; Aurélie Papadopoulos; Rachael Parke; Melissa Parker; Briseida Parra; Vieri Parrini; Taha Pasha; Jérémie Pasquier; Bruno Pastene; Fabian Patauner; Junaid Patel; Mohan Dass Pathmanathan; Luís Patrão; Patricia Patricio; Juliette Patrier; Lisa Patterson; Rajyabardhan Pattnaik; Christelle Paul; Mical Paul; Jorge Paulos; William A. Paxton; Jean-François Payen; Kalaiarasu Peariasamy; Miguel Pedrera Jiménez; Giles J. Peek; Florent Peelman; Nathan Peiffer-Smadja; Vincent Peigne; Mare Pejkovska; Paolo Pelosi; Ithan D. Peltan; Rui Pereira; Daniel Perez; Luis Periel; Thomas Perpoint; Antonio Pesenti; Vincent Pestre; Lenka Petrou; Ventzislava Petrov-Sanchez; Frank Olav Pettersen; Gilles Peytavin; Scott Pharand; Michael Piagnerelli; Walter Picard; Olivier Picone; Maria de Piero; Carola Pierobon; Djura Piersma; Carlos Pimentel; Raquel Pinto; Catarina Pires; Isabelle Pironneau; Lionel Piroth; Riinu Pius; Simone Piva; Laurent Plantier; Daniel Plotkin; Hon Shen Png; Julien Poissy; Ryadh Pokeerbux; Maria Pokorska-Spiewak; Sergio Poli; Georgios Pollakis; Diane Ponscarne; Jolanta Popielska; Andra-Maris Post; Douwe F. Postma; Pedro Pova; Diana Póvoas; Jeff Powis; Sofia Prapa; Sébastien Preau; Christian Prebensen; Jean-Charles Preiser; Anton Prinssen; Mark G. Pritchard; Gamage Dona Dilanthi Priyadarshani; Lucia Proença; Sravya Pudota; Oriane Puéchal; Bambang Pujo Semedi; Mathew Pulicken; Gregory Purcell; Luisa Quesada; Vilmaris Quinones-Cardona; Víctor Quirós González; Else Quist-Paulsen; Mohammed Quraishi; Maia Rabaa; Christian Rabaud; Ebenezer Rabindrarajan; Aldo Rafael; Marie Rafiq; Gabrielle Ragazzo; Ahmad Kashfi Haji Ab Rahman; Rozanah Abd Rahman; Arsalan Rahutullah; Fernando Rainieri; Giri Shan Rajahram; Nipunie Rajapakse; Azrina Ralib; Nagarajan Ramakrishnan; Kollengode Ramanathan; Ahmad Afiq Ramli; Blandine Rammaert; Grazielle Viana Ramos; Asim Rana; Rajavardhan Rangappa; Ritika Ranjan; Christophe Rapp; Aasiyah Rasha; Thalha Rasha; Ghulam Rasheed; Menaldi Rasmin; Indrek Rätsep; Cornelius Rau; Tharmini Ravi; Ali Raza; Andre Real; Stanislas Rebaudet; Sarah Redl; Brenda Reeve; Ali Rehan; Attaur Rehman; Liadain Reid; Liadain Reid; Dag Henrik Reikvam; Renato Reis; Jordi Rello; Jonathan Remppis; Martine Remy; Hongru Ren; Hanna Renk; Liliana Resende; Anne-Sophie Resseguier; Matthieu Revest; Oleksa Rewa; Luis Felipe Reyes; Tiago Reyes; Maria Ines Ribeiro; David Richardson; Denise Richardson; Laurent Richier; Siti Nurul Atikah Ahmad Ridzuan; Jordi Riera; Ana L Rios; Asgar Rishu; Patrick Rispal; Karine Risso; Maria Angelica Rivera Nuñez; Nicholas Rizer; Doug Robb; Chiara Robba; André Roberto; Stephanie Roberts; David L. Robertson; Olivier Robineau; Ferran Roche-Campo; Paola Rodari; Simão Rodeia; Julia Rodriguez Abreu; Bernhard Roessler; Claire Roger; Pierre-Marie Roger; Emmanuel Roilides; Amanda Rojek; Juliette Romaru; Roberto Roncon-Albuquerque Jr; Mélanie Roriz; Manuel Rosa-Calatrava; Michael Rose; Dorothea Rosenberger; Andrea Rossanese; Matteo Rossetti; Bénédicte Rossignol; Patrick Rossignol; Stella Rousset; Carine Roy; Benoît Roze; Desy Rusmawatingtyas; Clark D. Russell; Maria Ryan; Maeve Ryan; Steffi Ryckaert; Aleksander Rygh Holten; Isabela Saba; Sairah Sadaf; Musharaf Sadat; Valla Sahraei; Maximilien Saint-Gilles; Pranya Sakiyalak; Nawal Salahuddin; Leonardo Salazar; Jodat Saleem; Jodat Saleem; Gabriele Sales; Stéphane Sallaberry; Charlotte Salmon Gandonniere; Hélène Salvator; Olivier Sanchez; Xavier Sánchez Choez; Kizy Sanchez de Oliveira; Angel Sanchez-Miralles; Vanessa Sancho-Shimizu; Gyan Sandhu; Zulfiqar Sandhu; Pierre-François Sandrine; Oana Sandulescu; Marlene Santos; Shirley Sarfo-Mensah; Bruno Sarmento Banheiro; Iam Claire E. Sarmiento; Benjamine Sarton; Sree Satyapriya; Rumaisah Satyawati; Egle Saviciute; Raymond Savio; Parthena Savvidou; Yen Tsen Saw; Justin Schaffer; Tjard Schermer; Arnaud Scherpereel; Marion Schneider; Stephan Schroll; Michael Schwameis; Gary Schwartz; Janet T. Scott; James Scott-Brown; Nicholas Sedillot; Tamara Seitz; Jaganathan Selvanayagam; Mageswari Selvarajoo; Caroline Semaille;

Malcolm G. Semple; Rasidah Bt Senian; Eric Senneville; Claudia Sepulveda; Filipa Sequeira; Tânia Sequeira; Ary Serpa Neto; Pablo Serrano Balazote; Ellen Shadowitz; Syamin Asyraf Shahidan; Mohd Shahnaz Hasan; Mohammad Shamsah; Anuraj Shankar; Shaikh Sharjeel; Pratima Sharma; Catherine A. Shaw; Victoria Shaw; Haixia Shi; Nisreen Shiban; Mohiuddin Shiekh; Takuya Shiga; Nobuaki Shime; Hiroaki Shimizu; Keiki Shimizu; Naoki Shimizu; Nahoko Shindo; Sally Shrapnel; Hoi Ping Shum; Nassima Si Mohammed; Ng Yong Siang; Jeanne Sibiude; Atif Siddiqui; Louise Sigfrid; Piret Sillaots; Catarina Silva; Maria Joao Silva; Rogério Silva; Benedict Sim Lim Heng; Wai Ching Sin; Budha Charan Singh; Punam Singh; Pompini Agustina Sitompul; Karisha Sivam; Vegard Skogen; Sue Smith; Benjamin Smood; Coilin Smyth; Michelle Smyth; Michelle Smyth; Morgane Snacken; Dominic So; Tze Vee Soh; Monserrat Solis; Joshua Solomon; Tom Solomon; Emily Somers; Agnès Sommet; Myung Jin Song; Rima Song; Tae Song; Jack Song Chia; Michael Sonntagbauer; Azlan Mat Soom; Alberto Sotto; Edouard Soum; Ana Chora Sousa; Marta Sousa; Maria Sousa Uva; Vicente Souza-Dantas; Alexandra Sperry; Elisabetta Spinuzza; B. P. Sanka Ruwan Sri Darshana; Shiranee Srisikandan; Sarah Stabler; Thomas Staudinger; Stephanie-Susanne Stecher; Trude Steinsvik; Ymkje Stienstra; Birgitte Stiksrud; Eva Stolz; Amy Stone; Anca Streinu-Cercel; Adrian Streinu-Cercel; Samantha Strudwick; Ami Stuart; David Stuart; Decy Subekti; Gabriel Suen; Jacky Y. Suen; Prasanth Sukumar; Asfia Sultana; Charlotte Summers; Dubravka Supic; Deepashankari Suppiah; Magdalena Surovcová; Suwarti Suwarti; Andrey A Svistunov; Sarah Syahrin; Konstantinos Syrigos; Jaques Sztajnbock; Konstanty Szuldrzynski; Shirin Tabrizi; Fabio S. Taccone; Lysa Tagherst; Shahdattul Mawarni Taib; Ewa Talarek; Sara Taleb; Jelmer Talsma; Maria Lawrensia Tampubolon; Le Van Tan; Kim Keat Tan; Yan Chyi Tan; Clarice Tanaka; Hiroyuki Tanaka; Taku Tanaka; Hayato Taniguchi; Hussain Tanveer; Huda Taqdees; Arshad Taqi; Coralie Tardivon; Pierre Tattevin; M Azhari Taufik; Hassan Tawfik; Richard S. Tedder; Tze Yuan Tee; João Teixeira; Sofia Tejada; Marie-Capucine Tellier; Sze Kye Teoh; Vanessa Teotonio; François Téoulé; Pleun Terpstra; Olivier Terrier; Nicolas Terzi; Hubert Tessier-Grenier; Adrian Tey; Alif Adlan Mohd Thabit; Zhang Duan Tham; Suvintheran Thangavelu; Vincent Thibault; Simon-Djamel Thiberville; Benoît Thill; Jananee Thirumanickam; Shaun Thompson; Emma C. Thomson; David Thomson; Surain Raaj Thanga Thuraj; Duong Bich Thuy; Ryan S. Thwaites; Paul Tierney; Vadim Tieroshyn; Peter S Timashev; Jean-François Timsit; Bharath Kumar Tirupakuzhi Vijayaraghavan; Noémie Tissot; Jordan Zhien Yang Toh; Maria Toki; Timo Tolppa; Kristian Tonby; Sia Loong Tonnii; Antoni Torres; Margarida Torres; Rosario Maria Torres Santos-Olmo; Hernando Torres-Zevallos; Michael Towers; Tony Trapani; Damien Traynor; Théo Treoux; Huynh Trung Trieu; Swagata Tripathy; Cécile Tromeur; Ioannis Trontzas; Tiffany Trouillon; Jeanne Truong; Christelle Tual; Sarah Tubiana; Helen Tuite; Jean-Marie Turmel; Lance C.W. Turtle; Anders Tveita; Pawel Twardowski; Makoto Uchiyama; PG Ishara Udayanga; Andrew Udy; Roman Ullrich; Zubair Umer; Alberto Uribe; Asad Usman; Cristinava Vajdovics; Luís Val-Flores; Ana Luiza Valle; Amélie Valran; Stijn Van de Velde; Marcel van den Berge; Machteld van der Feltz; Paul van der Valk; Nicky Van Der Vekens; Peter Van der Voort; Sylvie Van Der Werf; Marlice van Dyk; Laura van Gulik; Jarne Van Hattem; Steven van Lelyveld; Carolien van Netten; Gitte Van Twillert; Ilonka van Veen; Noémie Vanel; Henk Vanoverschelde; Pooja Varghese; Michael Varrone; Shoban Raj Vasudayan; Charline Vauchy; Helen Vaughan; Shaminee Veeran; Aurélie Veislinger; Sebastian Vencken; Sara Ventura; Annelies Verbon; José Ernesto Vidal; César Vieira; Deepak Vijayan; Joy Ann Villanueva; Judit Villar; Pierre-Marc Villeneuve; Andrea Villoldo; Nguyen Van Vinh Chau; Benoit Visseaux; Hannah Visser; Chiara Vitiello; Harald Vonkeman; Fanny Vuotto; Suhaila Abdul Wahab; Noor Hidayu Wahab; Nadirah Abdul Wahid; Marina Wainstein; Wan Fadzlina Wan Muhd Shukeri; Chih-Hsien Wang; Steven Anthony Webb; Jia Wei; Katharina Weil; Tan Pei Wen; Sanne Wesselius; T. Eoin West; Murray Wham; Bryan Whelan; Nicole White; Paul Henri Wicky; Aurélie Wiedemann; Surya Otto Wijaya; Keith Wille; Suzette Willems; Virginie Williams; Evert-Jan Wils; Ng Wing Yiu; Calvin Wong; Xin Ci Wong; Yew Sing Wong; Teck Fung Wong; Gan Ee Xian; Lim Saio Xian; Kuan Pei Xuan; Ioannis Xynogalas; Sophie Yacoub; Siti Rohani Binti Mohd Yakop; Masaki Yamazaki; Yazdan Yazdanpanah; Nicholas Yee Liang Hing; Cécile Yelnik; Chian Hui Yeoh; Stephanie Yerkovich; Toshiki Yokoyama; Hodane Yonis; Obada Yousif; Saptadi Yuliarto; Akram Zaaqoq; Marion Zabbe; Kai Zacharowski; Masliza Zahid; Maram Zahran; Nor Zaila Binti Zaidan; Maria Zambon; Miguel Zambrano; Alberto Zanella; Konrad Zawadka; Nurul Zaynah; Hiba

Zayyad; Alexander Zoufaly; David Zucman; The Western Australian COVID-19 Research Response; Mazankowski Heart Institute.

### **ISARIC Partner Funder/Network Acknowledgements**

This work was supported by the UK Foreign, Commonwealth and Development Office and Wellcome [215091/Z/18/Z] and the Bill & Melinda Gates Foundation [OPP1209135]; CIHR Coronavirus Rapid Research Funding Opportunity OV2170359; Grants from Rapid European COVID-19 Emergency Response research (RECOVER) [H2020 project 101003589] and ECRAID-base project from The European Union's Horizon 2020 Research and Innovation Programme, under the Grant Agreement number 965313; The Imperial NIHR Biomedical Research Centre; The Cambridge NIHR Biomedical Research Centre; and Endorsed by the Irish Critical Care- Clinical Trials Group, co-ordinated in Ireland by the Irish Critical Care- Clinical Trials Network at University College Dublin and funded by the Health Research Board of Ireland [CTN-2014-12].

This work uses Data / Material provided by patients and collected by the NHS as part of their care and support #DataSavesLives. The Data / Material used for this research were obtained from ISARIC4C. The COVID-19 Clinical Information Network (CO-CIN) data was collated by ISARIC4C Investigators. Data and Material provision was supported by grants from: the National Institute for Health Research (NIHR; award CO-CIN-01), the Medical Research Council (MRC; grant MC\_PC\_19059), and by the NIHR Health Protection Research Unit (HPRU) in Emerging and Zoonotic Infections at University of Liverpool in partnership with Public Health England (PHE), (award 200907), Wellcome Trust [Turtle, Lance-fellowship 205228/Z/16/Z], NIHR HPRU in Respiratory Infections at Imperial College London with PHE (award 200927), Liverpool Experimental Cancer Medicine Centre (grant C18616/A25153), NIHR Biomedical Research Centre at Imperial College London (award IS-BRC-1215-20013), and NIHR Clinical Research Network providing infrastructure support.

This work was possible due to the dedication and hard work of the Norwegian SARS-CoV-2 study team, and supported by grants from Research Council of Norway grant no 312780, and a philanthropic donation from Vivaldi Invest A/S owned by Jon Stephenson von Tetzchner; The dedication and hard work of the Groote Schuur Hospital Covid ICU Team, and supported by the Groote Schuur nursing and University of Cape Town registrar bodies coordinated by the Division of Critical Care at the University of Cape Town; and supported by the COVID clinical management team, AIIMS, Rishikesh, India.

### **Conflict of Interest (Col) Declarations**

Allavena, C. declares personal fees from ViiVHealthcare, MSD, Janssen and Gilead, all outside the submitted work.

Andréjak, C. declares personal fees for lecture from Astra Zeneca, outside the submitted work.

Cheng, M. declares grants from McGill Interdisciplinary Initiative in Infection and Immunity, grants from Canadian Institutes of Health Research, during the conduct of the study; personal fees from GEn1E Lifesciences (as a member of the scientific advisory board), personal fees from nplex biosciences (as a member of the scientific advisory board), outside the submitted work. He is the co-founder of Kanvas Biosciences and owns equity in the company. In addition, M. Cheng reports a patent Methods for detecting tissue damage, graft versus host disease, and infections using cell-free DNA profiling pending, and a patent Methods for assessing the severity and progression of SARS-CoV-2 infections using cell-free DNA pending.

Cholley, B. declares personal fees (for lectures and participation to advisory boards) from Edwards, Amomed, Nordic Pharma, and Orion Pharma.

Cruz-Bermúdez, J.L. declares personal fees from Elsevier for advice, outside the submitted work

Cummings, M. and O'Donnell, M. participated as investigators for clinical trials evaluating the efficacy and safety of remdesivir (sponsored by Gilead Sciences) and convalescent plasma (sponsored by Amazon) in hospitalized patients with COVID-19. Support for this work is paid to Columbia University.

Dalton, H. declares personal fees for medical director of Innovative ECMO Concepts and honorarium from Abiomed/BREETHE Oxi-1 and Instrumentation Labs.

Dyrhol-Riise, AM, declares grants from Gilead outside this work.

Deplanque, D. declares personal fees from Biocodex, Bristol-Myers Squibb and Pfizer (advisory boards)

Susanne Dudman has also received this grant no 312780 from the Norwegian Research Council

Durante-Mangoni, E. declares funding via his Institution from MSD, Pfizer, and personal fees or participation in advisory boards or participation to the speaker's bureau of Roche, Pfizer, MSD, Angelini, Correvio, Nordic Pharma, Bio-Merieux, Abbvie, Sanofi-Aventis, Medtronic, Tyrx and DiaSorin.

Gordon, AC. reports a Research Professorship from NIHR (RP-2015-06-18), and consulting fees from GlaxoSmithKline, Bristol Myers Squibb and 30 Respiratory paid to his institution outside of the submitted work

Grasselli, G. declares personal fees from Getinge, Biotest, Draeger Medical, Fisher & Paykel, MSD and unrestricted research grant from MSD and Fisher & Paykel, all outside the submitted work.

Ho, A. declares grant funding from Medical Research Council UK, Scottish Funding Council - Grand Challenges Research Fund, and the Wellcome Trust, outside this submitted work.

Holter, J. C. reports grants from Research Council of Norway grant no 312780, and from Vivaldi Invest A/S owned by Jon Stephenson von Tetzchner, during the conduct of the study.

Kimmoun, A. declares personal fees (payment for lectures) from Baxter, Aguetant, Aspen.

Kumar, D. declares grants and personal fees from Roche, GSK and Merck; and personal fees from Pfizer and Sanofi.

Kutsogiannis, D.J. declares personal fees for a lecture from Tabuk Pharmaceuticals and the Saudi Critical Care Society

Kutsyna, G. declares the study consulting fee for clinical trial ClinicalTrials.gov Identifier: NCT04762628

Laffey, J. reports that he has received fees for consultancy from GlaxoSmithKline and from Baxter Therapeutics for work outside the scope of this work.

Lairez, O. declares grant funding from Pfizer; conference fees from Amicus, GE Healthcare, Novartis, Sanofi-Genzyme, and Takeda-Shire; and consultancy fees from Alnylam, Amicus, Pfizer, Takeda-Shire.

Lee, J. reports grants from European Commission PREPARE grant agreement No 602525, European Commission RECOVER Grant Agreement No 101003589 and ECRAID-base project from The European Union's Horizon 2020 Research and Innovation Programme, under the Grant Agreement number 965313 supporting the conduct, coordination and management of the work.

Lee, T.C. declares research salary support from les Fonds de recherche du Québec – Santé.

Lefèvre, B. declares travel/accommodation/meeting expenses from Mylan and Gilead, all outside the submitted work.

Lemaignen, A. declares personal fees (payment for lectures) from MSD and Gilead; and travel/accommodation/meeting expenses from Pfizer.

Lescure, F.X. declares personal fees (payment for lectures) from Gilead, MSD; and travel/accommodation/meeting expenses from Astellas, Eumedica, MSD.

Liu, K. reports personal fees from MERA and receives a salary from TXP Medical completely outside the submitted work.

Martin-Loeches I. declares consulting fees for Gilead outside of the submitted work.

Martín-Quiros, A. declares consulting fees for Gilead.

Mentré F, declares consulting fees from IPSEN, Servier and Da Volterra, and reports research grants to her group from Sanofi, Roche, Servier and Da Voleterra, all outside the submitted work.

Murthy, S declares receiving salary support from the Health Research Foundation and Innovative Medicines Canada Chair in Pandemic Preparedness Research.

Nichol, A. declares a grant from the Health Research Board of Ireland to support data collection in Ireland (CTN-2014-012).

Openshaw, P. has served on scientific advisory boards for Janssen/J&J, Oxford Immunotech Ltd, GSK, Nestle and Pfizer (fees to Imperial College). He is Imperial College lead investigator on EMINENT, a consortium funded by the MRC and GSK. He is a member of the RSV Consortium in Europe (RESCEU) and Inno4Vac, Innovative Medicines Initiatives (IMI) from the European Union.

Peltan, I.D. declares grant support from the National Institutes of Health and, outside the submitted work, grant support from Centers for Disease Control and Prevention, and Janssen and payments to his institution for trials by Regeneron and Asahi Kasei Pharma on which he served as an investigator.

Pesenti, A. declares personal fees from Maquet, Novalung/Xenios, Baxter, and Boehringer Ingelheim.

Poissy, J. declares personal fees from Gilead for lectures, outside the submitting work

Povoa, P. declares personal fees (for lectures and advisory boards) from MSD, Technophage, Sanofi, and Gilead.

Póvoas, D. declares consulting fees (for lectures and/or participation in advisory boards) from Roche and Viiv Healthcare; and travel/accommodation/meeting expenses from Abbvie, Gilead Sciences, Janssen Cilag, Merck Sharp & Dohme and Viiv Healthcare

Rewa, O. declares consulting fees from Baxter Inc.

Rossanese, A. declares consulting fees (for lectures and/or participation to advisory boards) from Emergent BioSolutions and Sanofi Pasteur, but all outside of the frame of the submitted work.

Săndulescu, O. has been an investigator in COVID-19 clinical trials by Algernon Pharmaceuticals, Atea Pharmaceuticals, Regeneron Pharmaceuticals, Diffusion Pharmaceuticals, and Celltrion, Inc., outside the scope of the submitted work.

Semple, M.G. reports grants from DHSC National Institute of Health Research UK, from the Medical Research Council UK, and from the Health Protection Research Unit in Emerging & Zoonotic Infections, University of Liverpool, supporting the conduct of the study; other interest in Integrum Scientific LLC, Greensboro, NC, USA, outside the submitted work.

Serpa Neto, A. declares personal lecture fees from Drager outside the submitted work.

Shrapnel, S. participated as an investigator for an observational study analysing ICU patients with COVID-19 (for the Critical Care Consortium including ECMOCARD) funded by The Prince Charles Hospital Foundation during the conduct of this study. S. Shrapnel reports in kind support from the Australian Research Council Centre of Excellence for Engineered Quantum Systems (CE170100009).

Streinu-Cercel, Adrian has been an investigator in COVID-19 clinical trials by Algernon Pharmaceuticals, Atea Pharmaceuticals, Regeneron Pharmaceuticals, Diffusion Pharmaceuticals, and Celltrion, Inc., outside the scope of the submitted work.

Streinu-Cercel, Anca has been an investigator in COVID-19 clinical trials by Algernon Pharmaceuticals, Atea Pharmaceuticals, Regeneron Pharmaceuticals, Diffusion Pharmaceuticals, and Celltrion, Inc., outside the scope of the submitted work.

Summers, C. reports that she has received fees for consultancy for Abbvie relating to COVID-19 therapeutics. She was also the UK Chief Investigator of a GlaxoSmithKline plc sponsored study of a therapy for COVID, and is a member of the UK COVID Therapeutic Advisory Panel (UK-CTAP). Outside the scope of this work, Dr Summers' institution receives research grants from the Wellcome Trust, UKRI/MRC, National Institute for Health Research (NIHR), GlaxoSmithKline and AstraZeneca to support research in her laboratory.

Tedder, R. reports grants from MRC/UKRI during the conduct of the study. In addition, R. Tedder has a patent United Kingdom Patent Application No. 2014047.1 "SARS-CoV-2 antibody detection assay" issued.

Timsit, J.F. declares personal fees from Merck, Pfizer, Gilead, Beckton dickinson, Medimune, Bayer pharma, and reports research grants to his research unit from Pfizerpers, Merck, Thermofisher.

Troost, J. declares personal fees from General Electric and Procter and Gamble.

Ullrich, R. reports grant funding to his institution from Apeptico, APEIRON, Biotest, Bayer, CCORE and Philips, as well as personal fees from Biotest. He holds European patent EP15189777.4 "Blood purification device" and equity in CCORE Technology GesmbH, a medical device research and development company.

Visseaux B. declares personal fees from BioMérieux, Qiagen and Gilead and research grants from Qiagen, all outside the submitted work.

West, E. reports grant funding from the Firland Foundation, the US CDC, and the Bill and Melinda Gates Foundation for studies of COVID-19, and grant funding from the US NIH for studies of other respiratory infections.

Guerguerian AM. Participated as site investigator for the Hospital For Sick Children, Toronto, Canada as a site through SPRINT-SARI Study via the Canadian Critical Care Trials Group sponsored in part by the Canadian Institutes of of Health Research.
